# Supplementary material for: Anti-Fibrotic Potential of Angiotensin (1-7) in Hemodynamically Overloaded Rat Heart
Source: MDPI journal article supplement (doi:10.3390/ijms24043490), 2023-02-09

SMAD2/3

LV

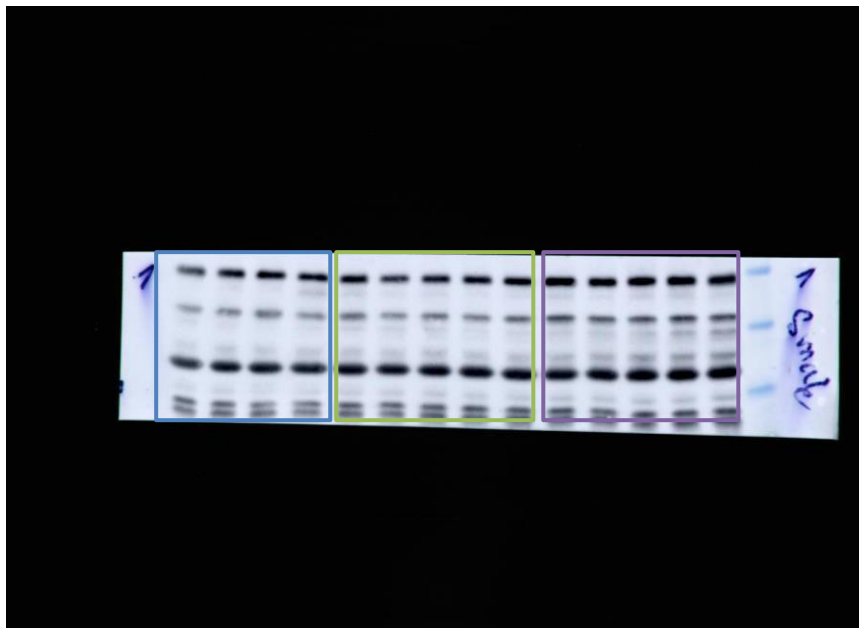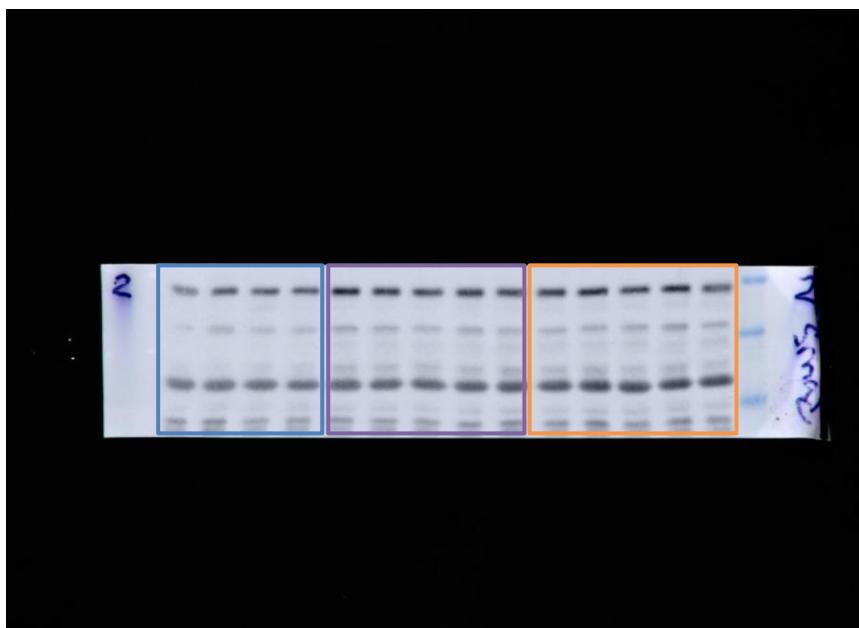

blue frame - HSD ACF

green frame - TGR ACF

violet frame - TGR(A1-7)3292

orange frame - TGR(A1-7)3292 ACF

RV

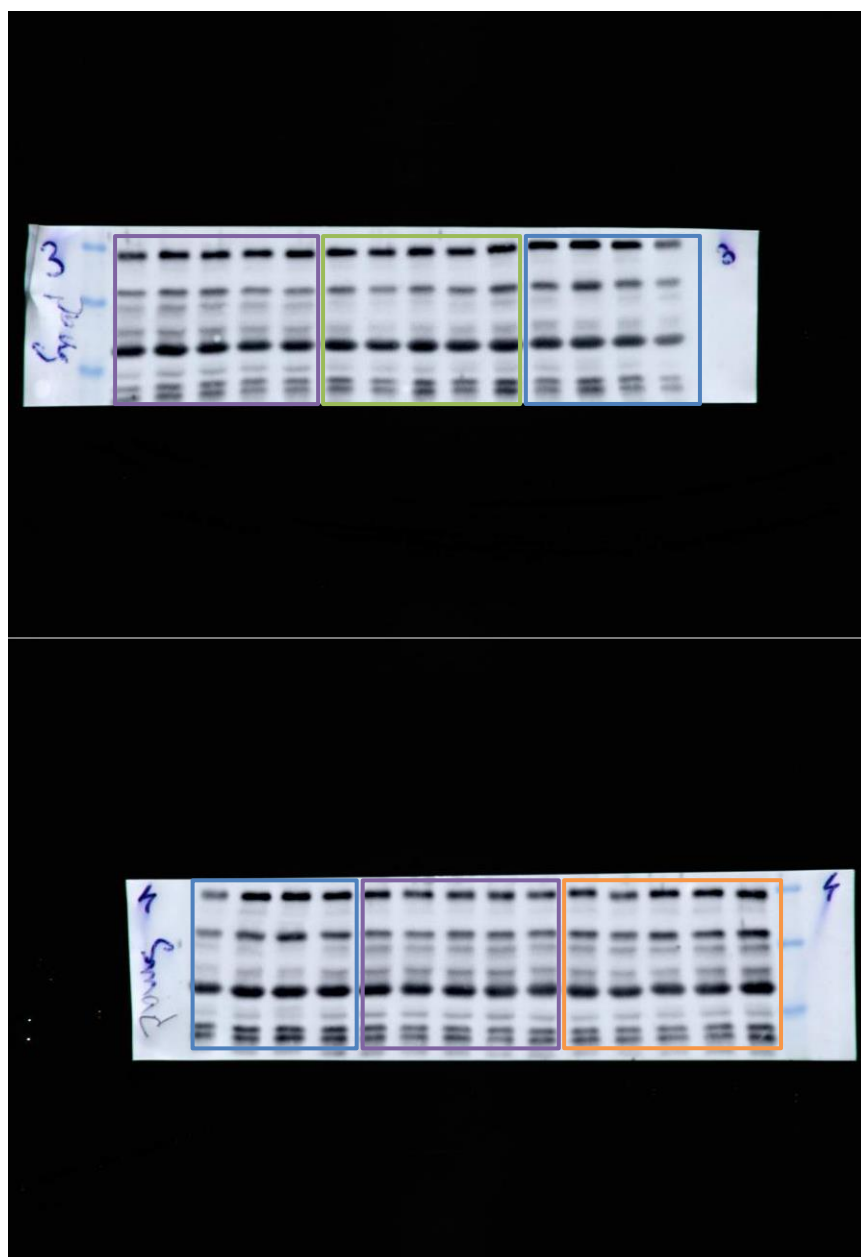

blue frame - HSD ACF  
green frame - TGR ACF  
violet frame - TGR(A1-7)3292  
orange frame - TGR(A1-7)3292 ACF

PKC $\delta$

LV

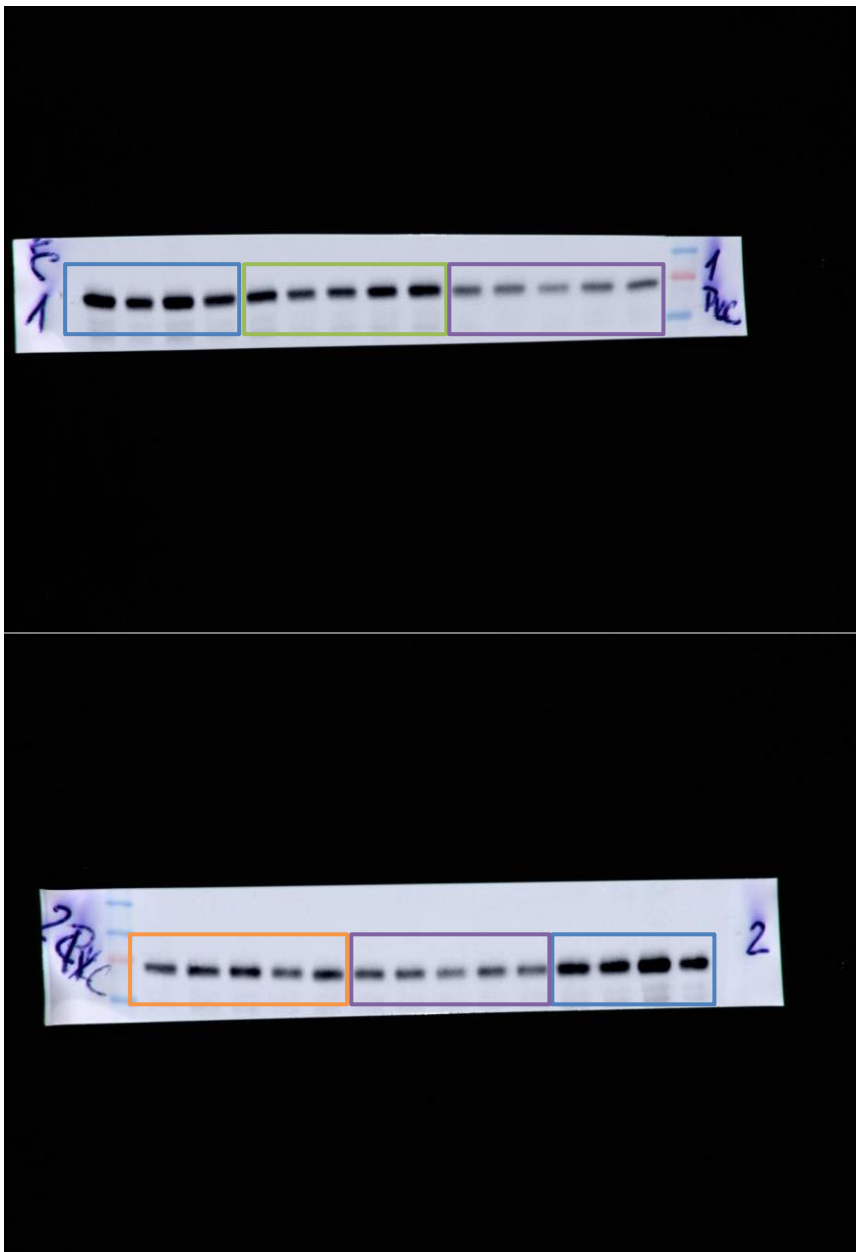

blue frame - HSD ACF

green frame - TGR ACF

violet frame - TGR(A1-7)3292

orange frame - TGR(A1-7)3292 ACF

RV

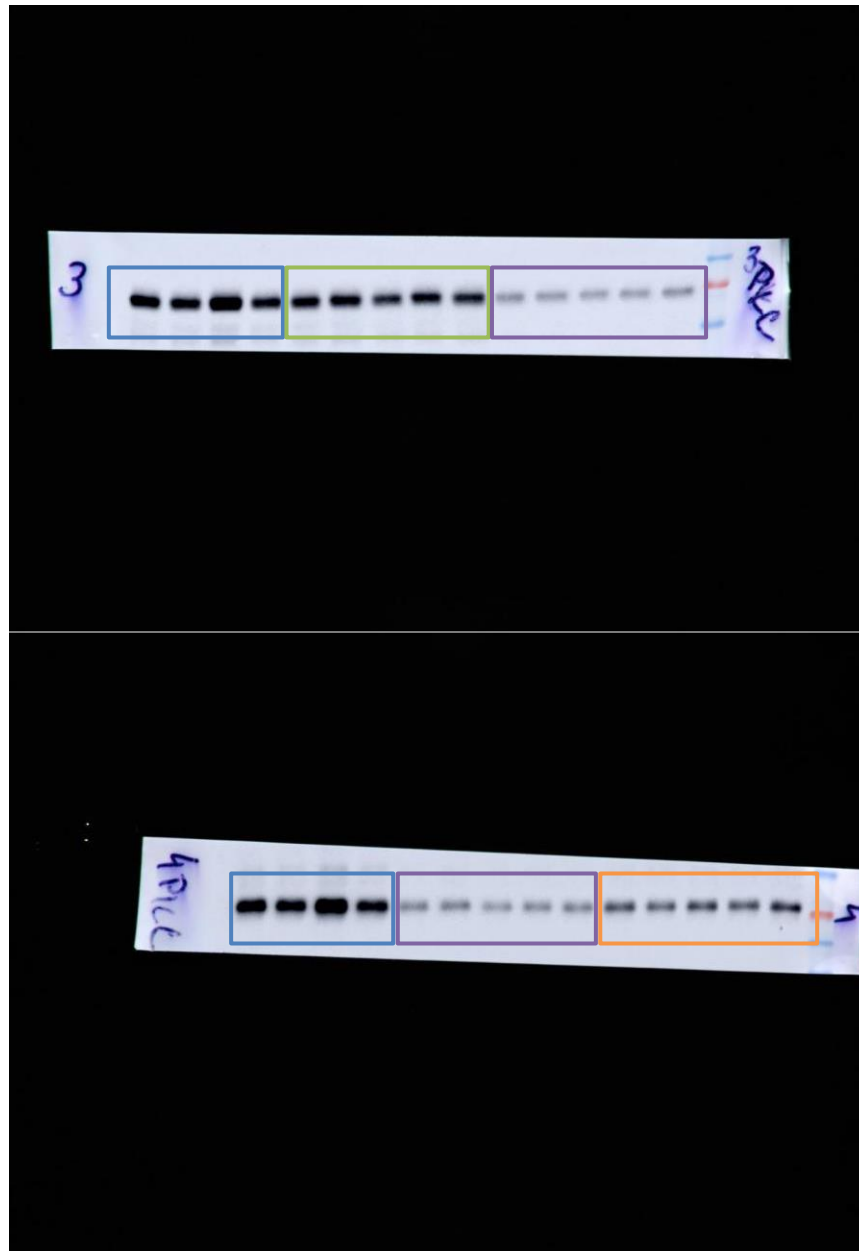

blue frame - HSD ACF  
green frame - TGR ACF  
violet frame - TGR(A1-7)3292  
orange frame - TGR(A1-7)3292 ACF

PKC $\alpha$

LV

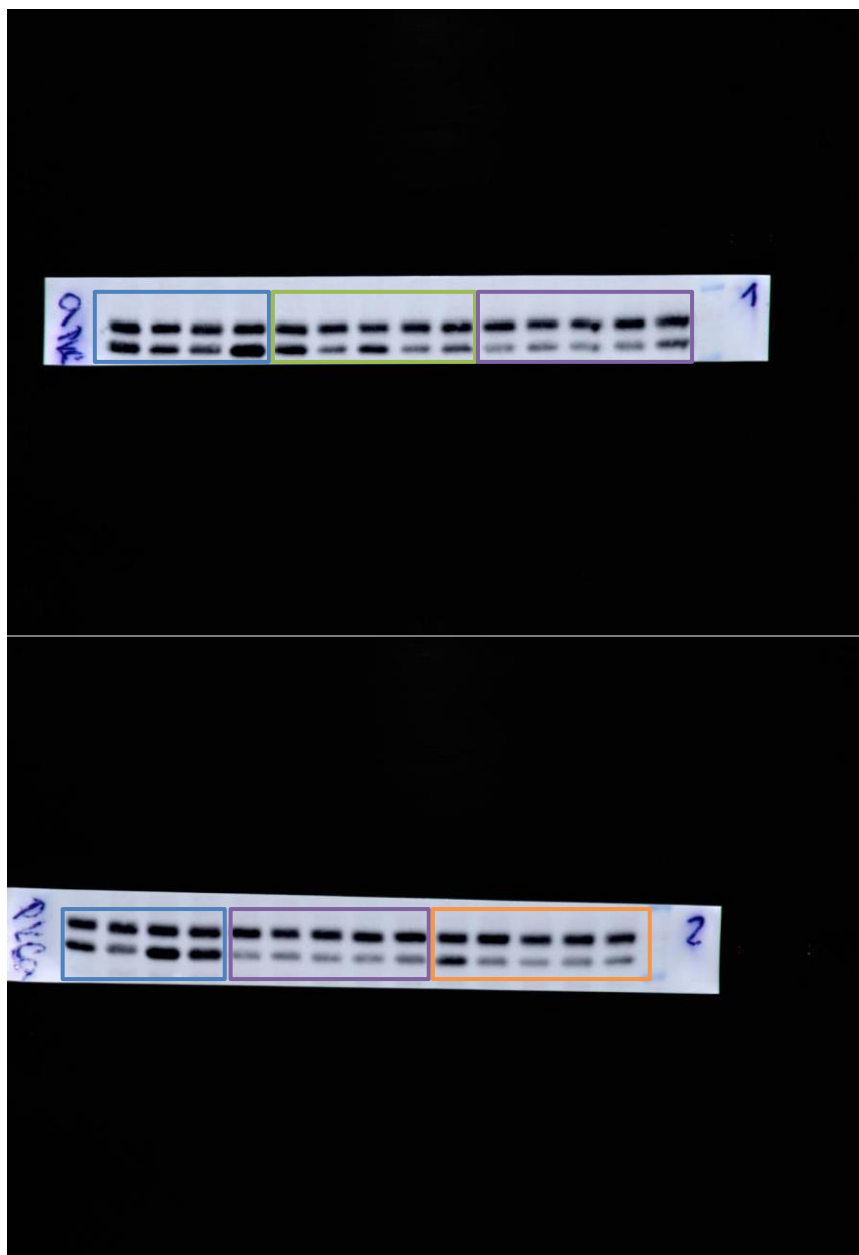

blue frame - HSD ACF

green frame - TGR ACF

violet frame - TGR(A1-7)3292

orange frame - TGR(A1-7)3292 ACF

RV

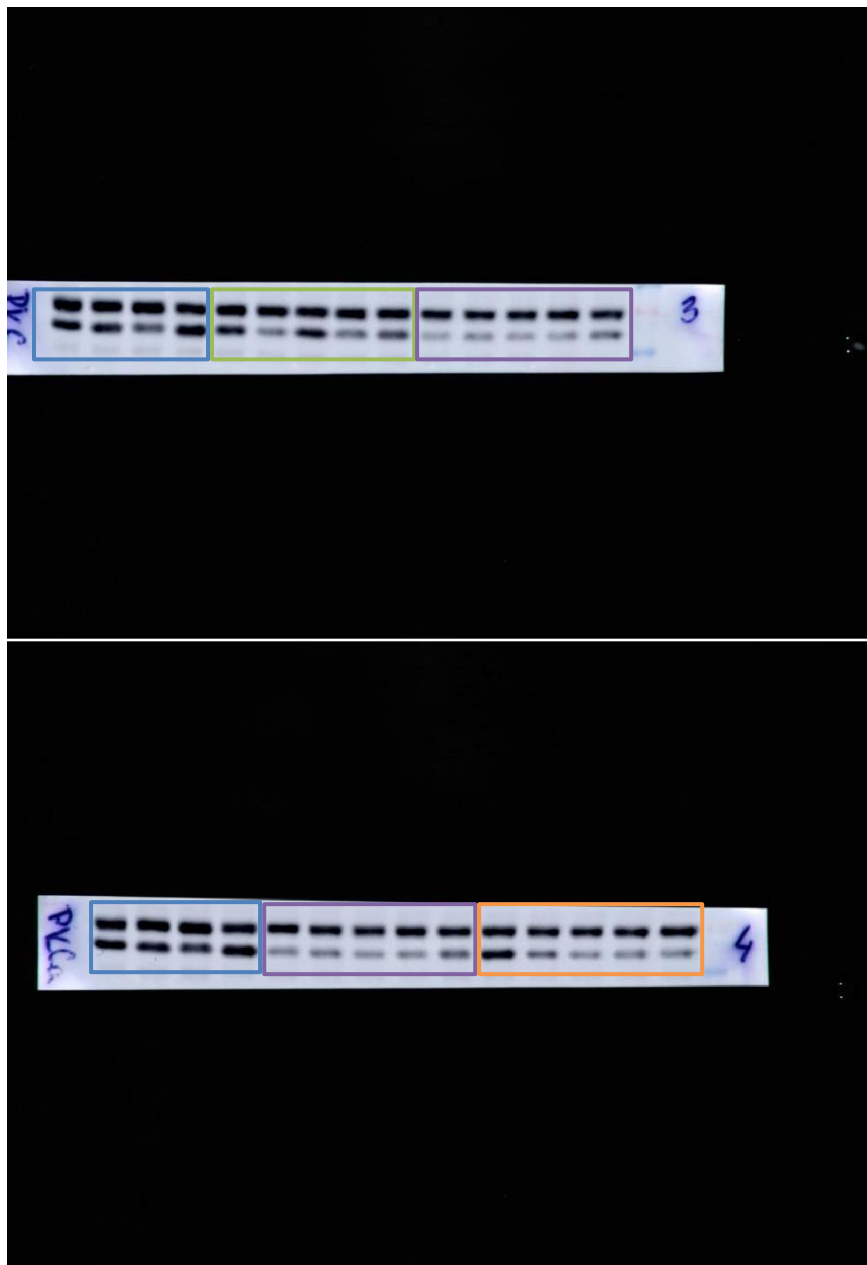

blue frame - HSD ACF

green frame - TGR ACF

violet frame - TGR(A1-7)3292

orange frame - TGR(A1-7)3292 ACF

PKCε

RV

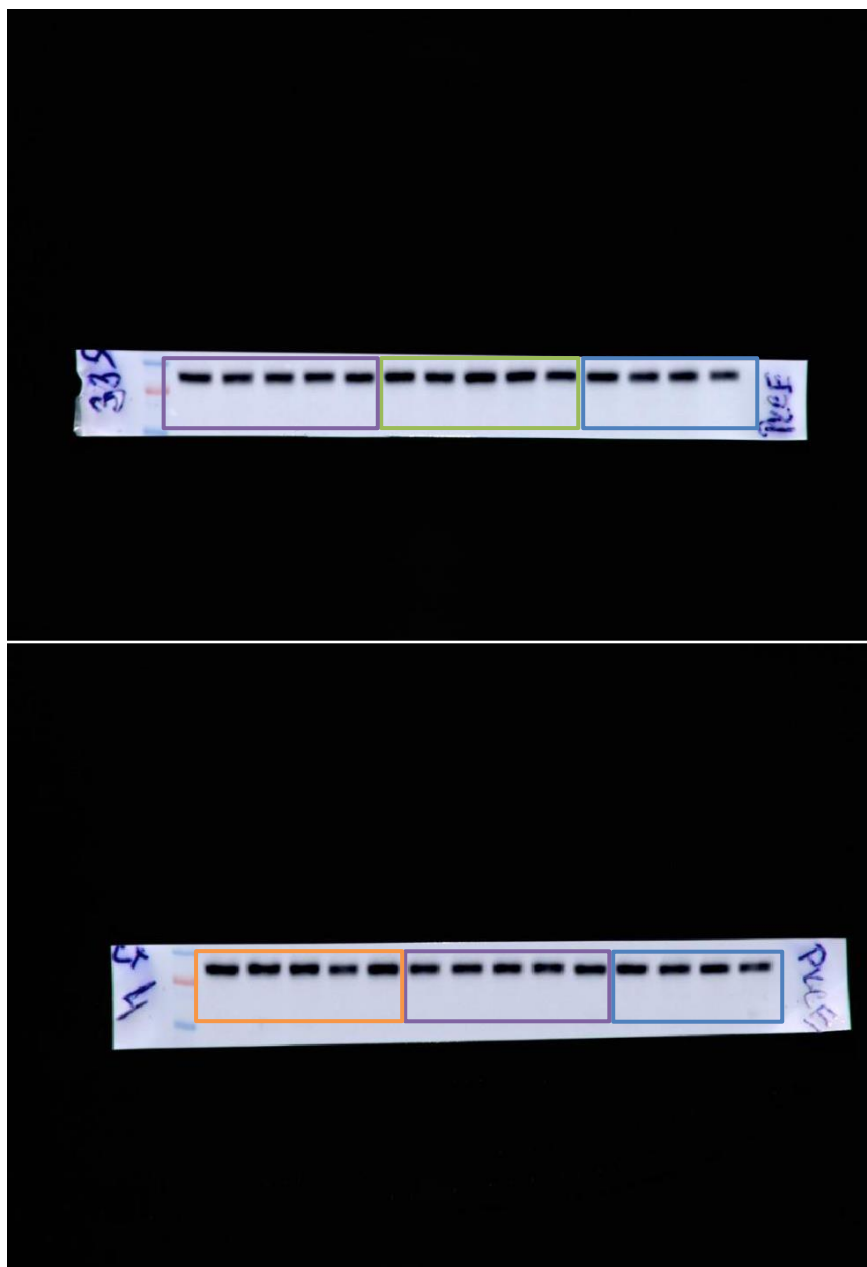

blue frame - HSD ACF

green frame - TGR ACF

violet frame - TGR(A1-7)3292

orange frame - TGR(A1-7)3292 ACF

LV

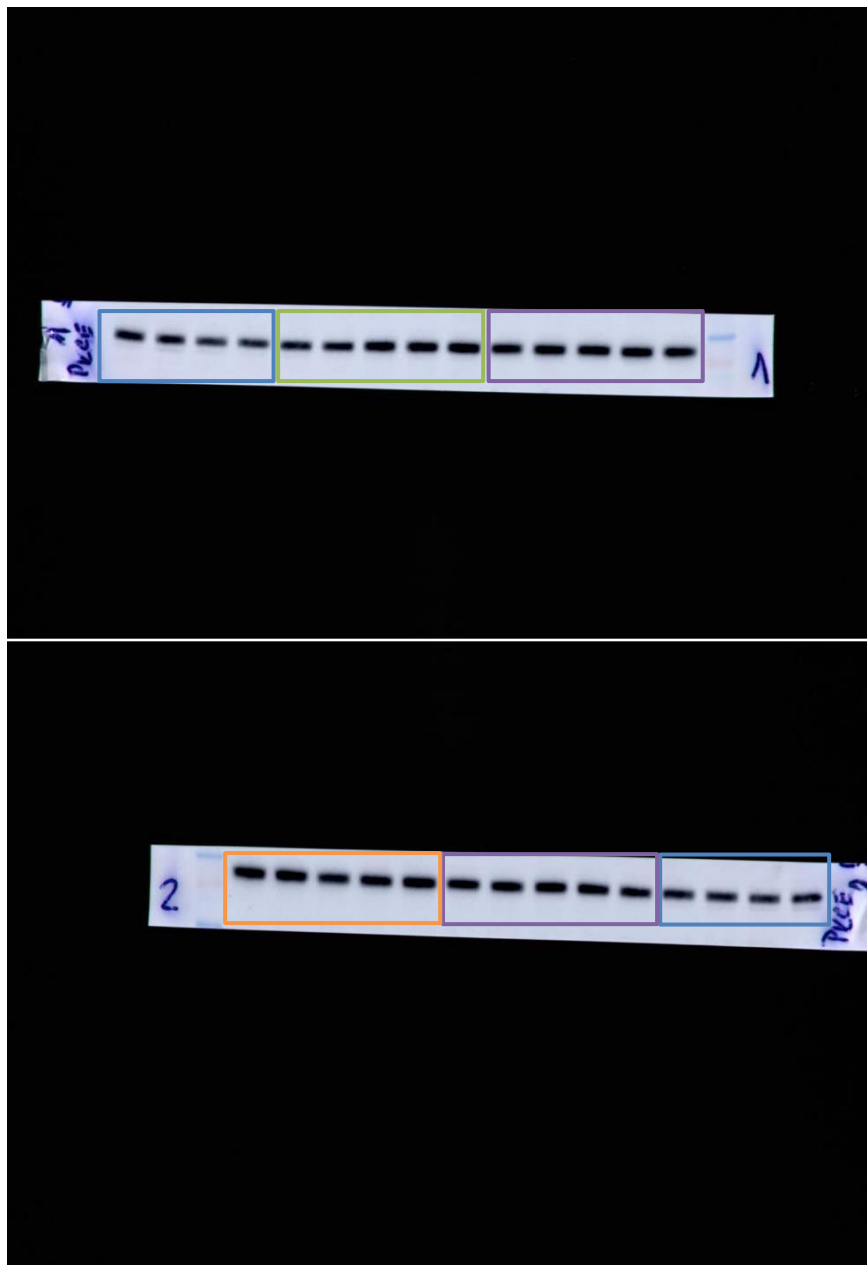

blue frame - HSD ACF

green frame - TGR ACF

violet frame - TGR(A1-7)3292

orange frame - TGR(A1-7)3292 ACF



pCx43

LV

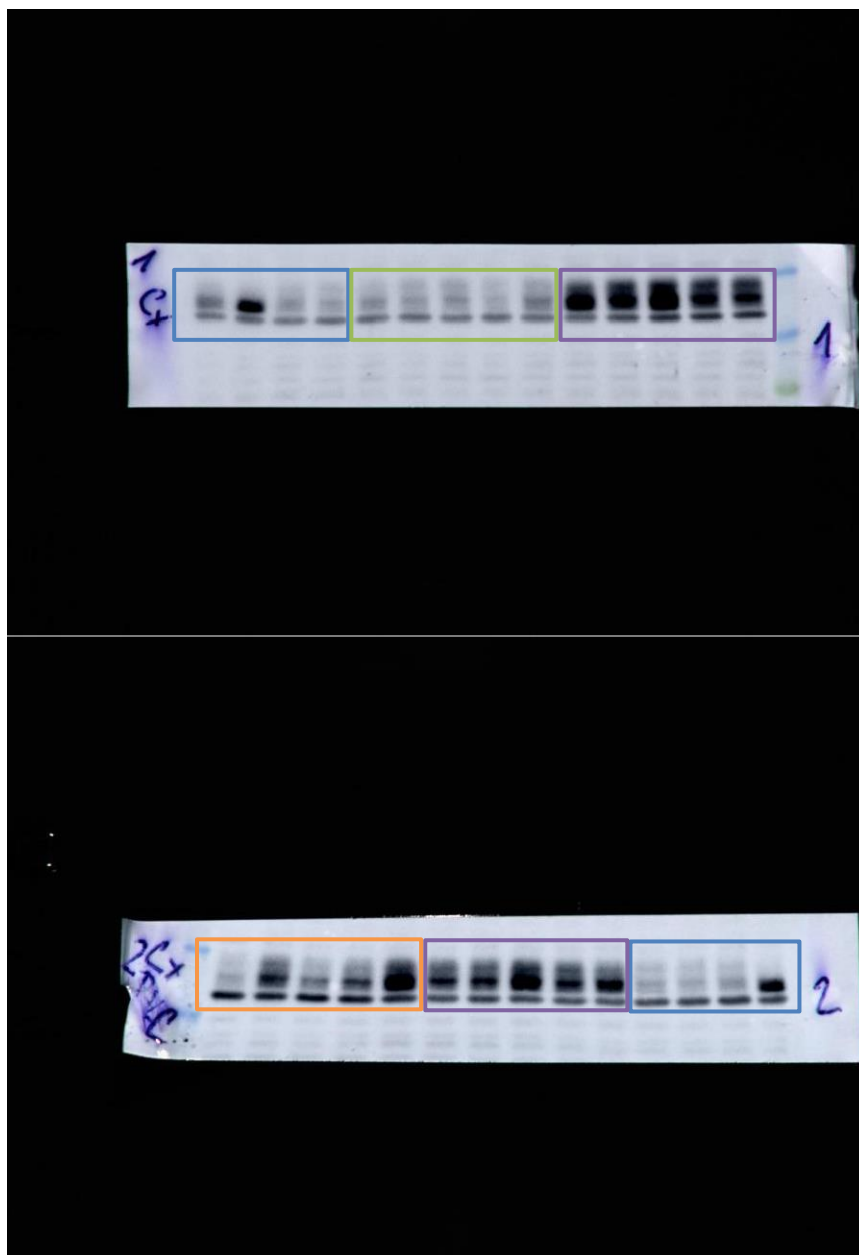

blue frame - HSD ACF

green frame - TGR ACF

violet frame - TGR(A1-7)3292

orange frame - TGR(A1-7)3292 ACF

RV

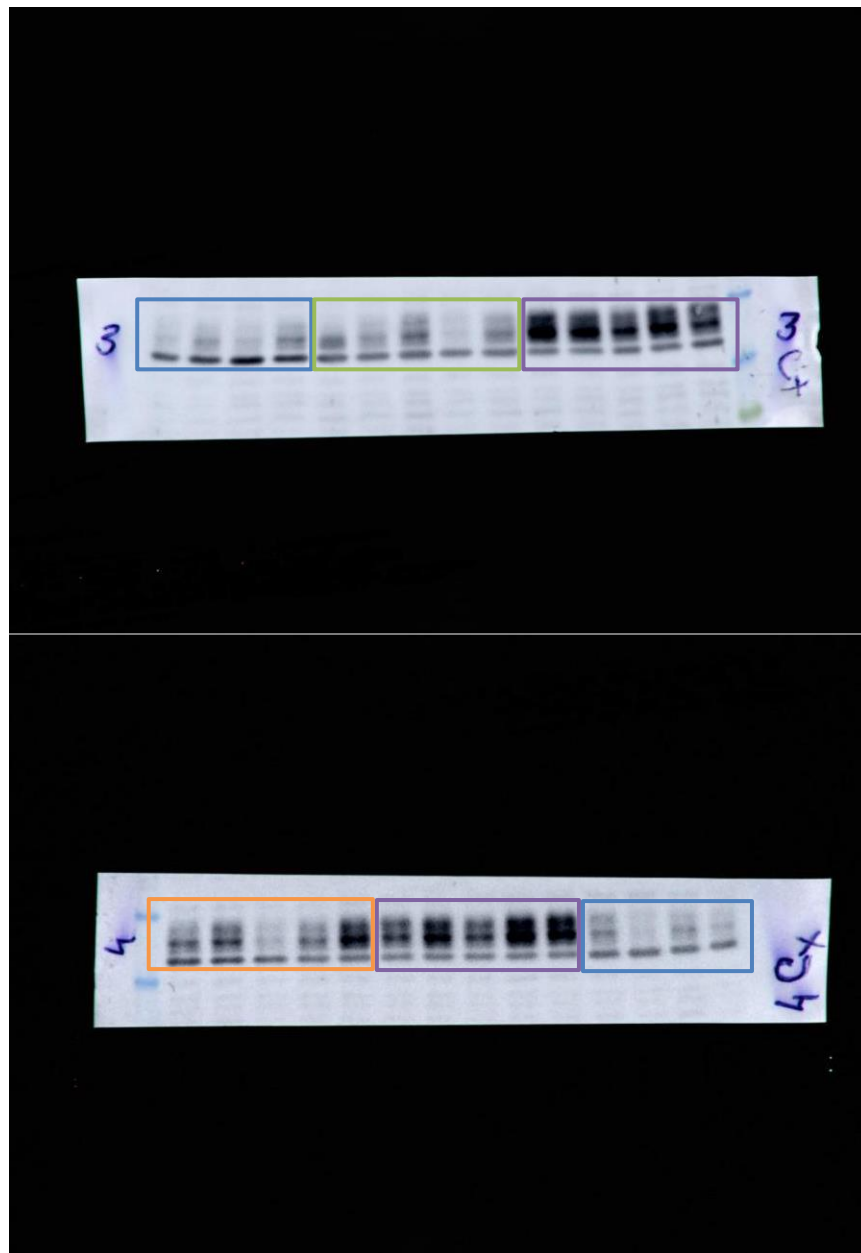

blue frame - HSD ACF  
green frame - TGR ACF  
violet frame - TGR(A1-7)3292  
orange frame - TGR(A1-7)3292 ACF

Cx43

RV

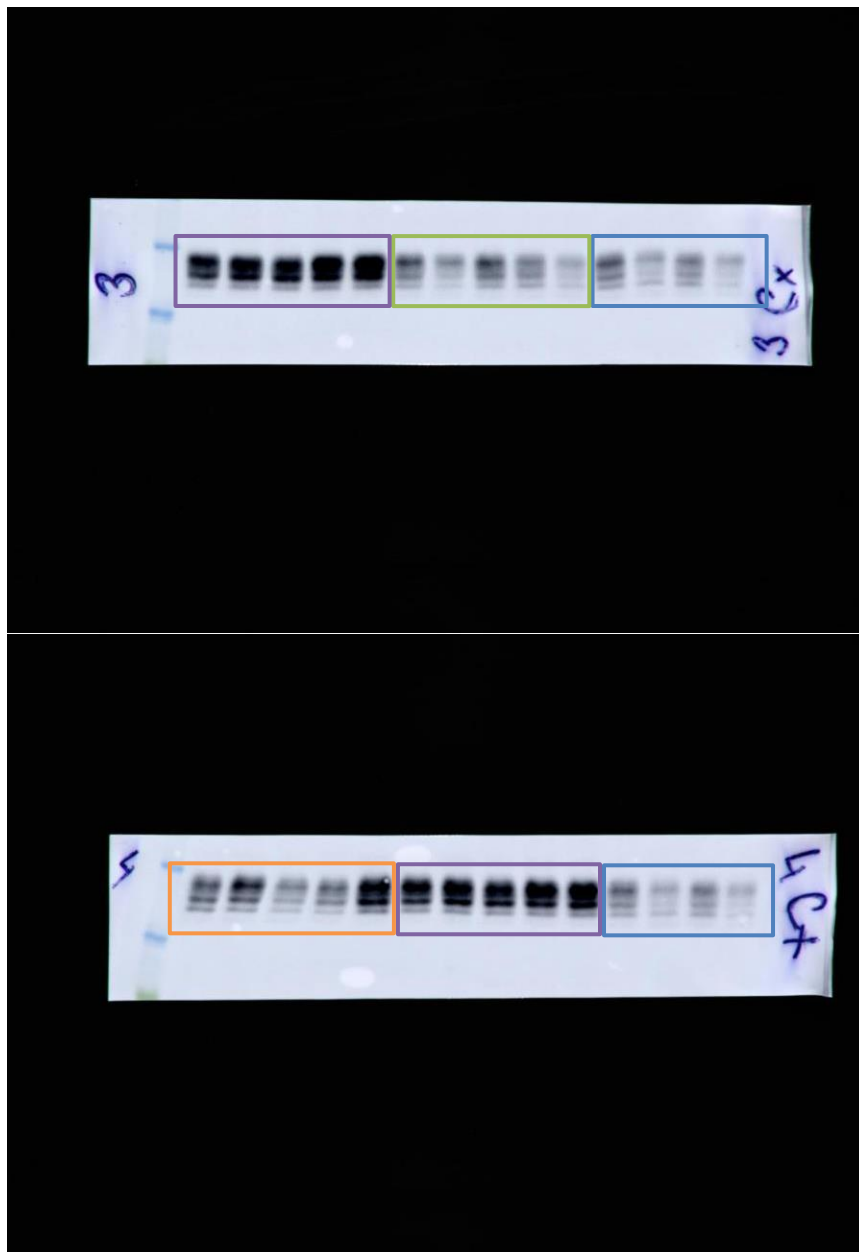

blue frame - HSD ACF

green frame - TGR ACF

violet frame - TGR(A1-7)3292

orange frame - TGR(A1-7)3292 ACF

LV

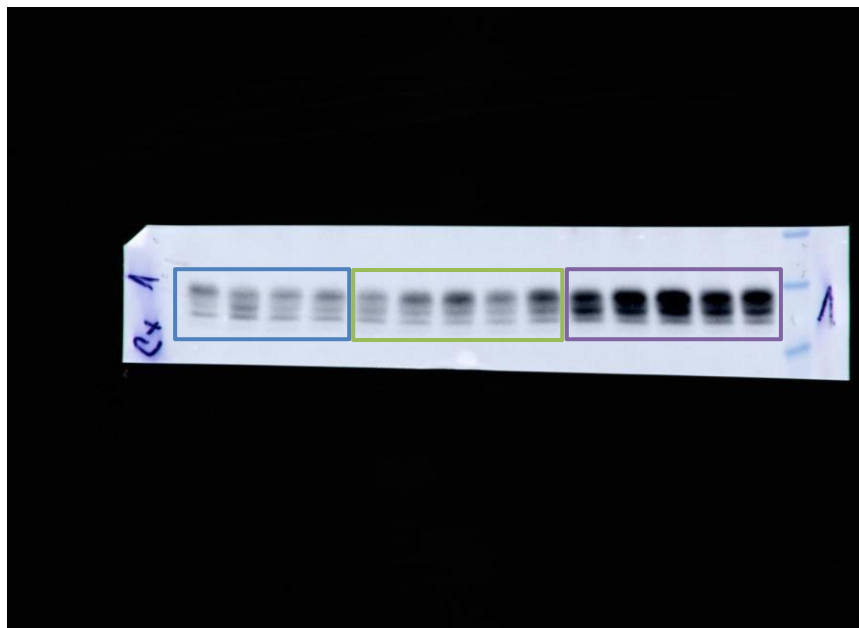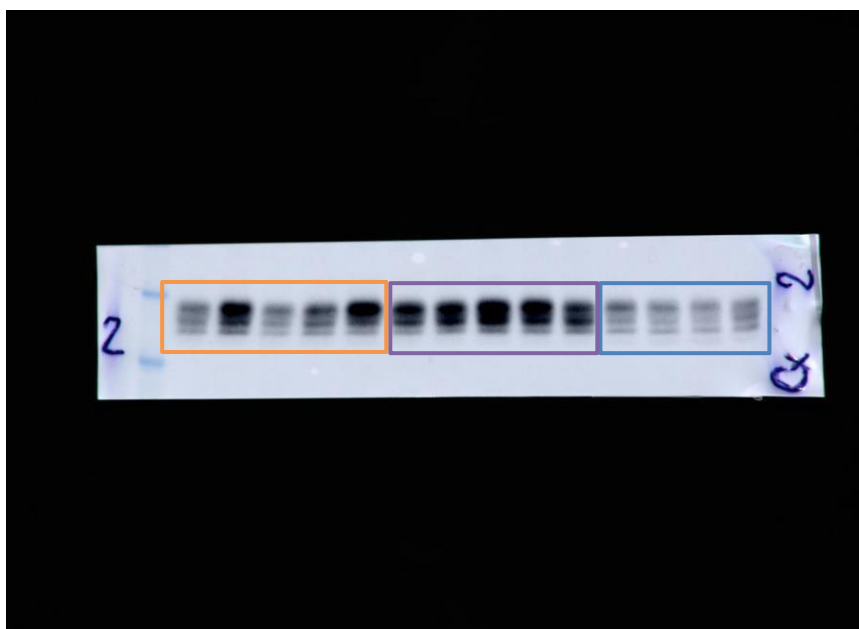

blue frame - HSD ACF  
green frame - TGR ACF  
violet frame - TGR(A1-7)3292  
orange frame - TGR(A1-7)3292 ACF

MMP-2

LV

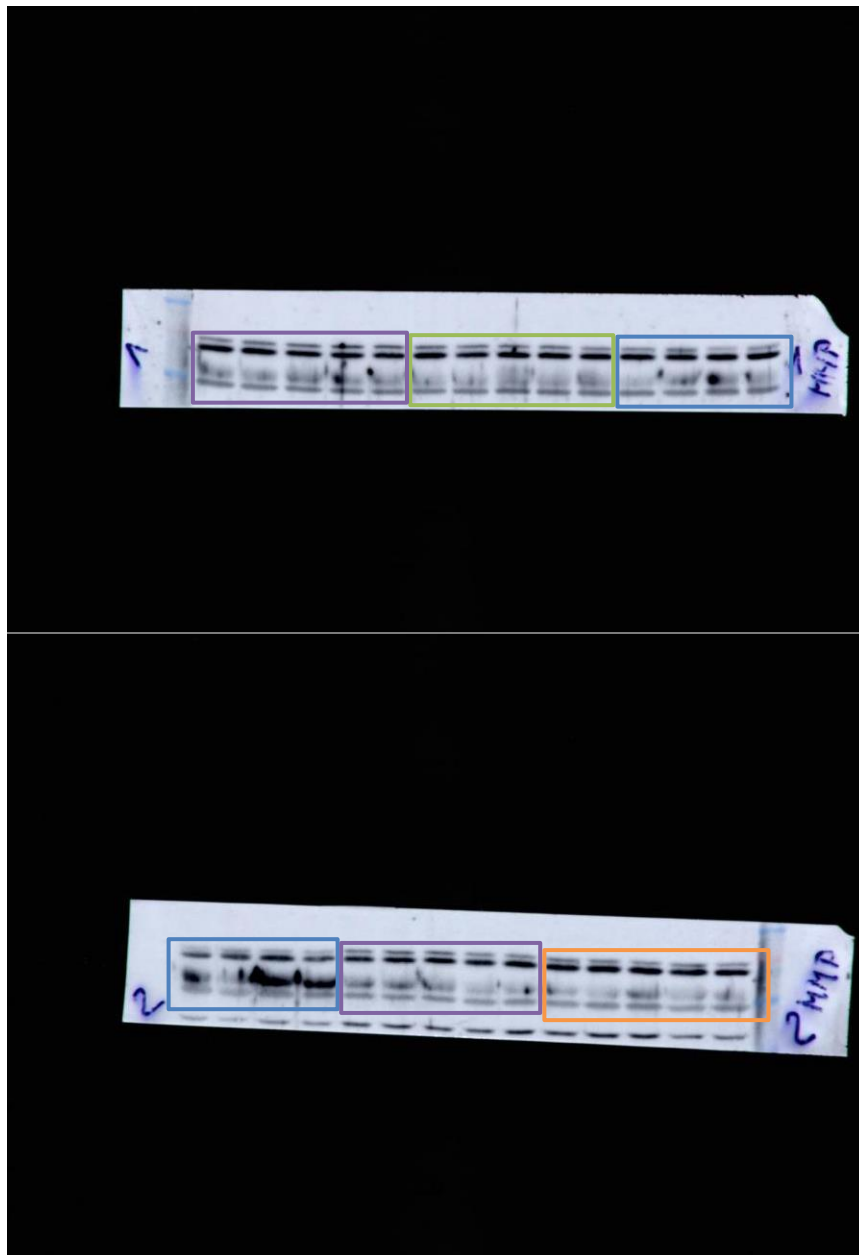

blue frame - HSD ACF

green frame - TGR ACF

violet frame - TGR(A1-7)3292

orange frame - TGR(A1-7)3292 ACF

RV

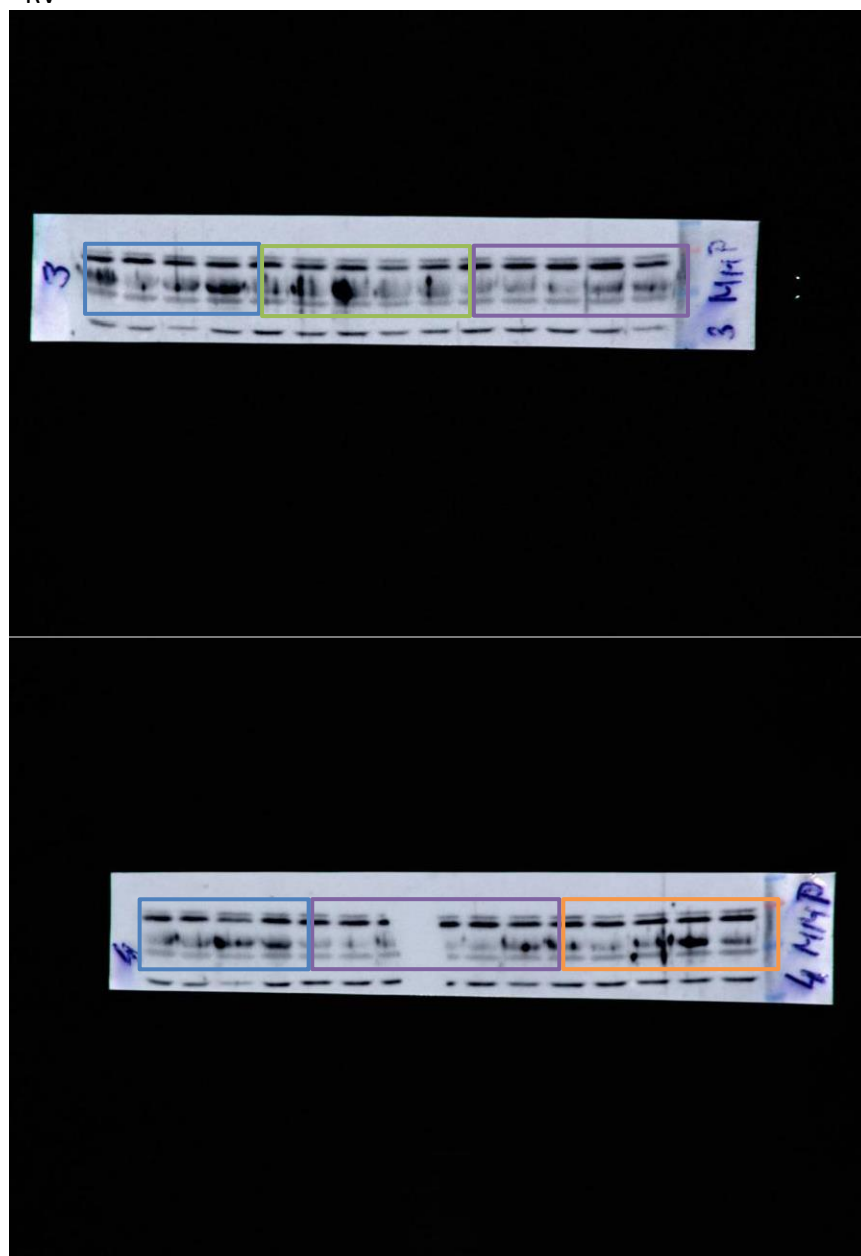

blue frame - HSD ACF  
green frame - TGR ACF  
violet frame - TGR(A1-7)3292  
orange frame - TGR(A1-7)3292 ACF

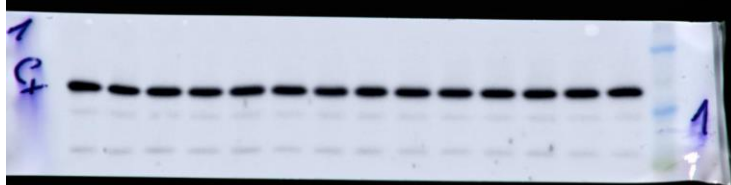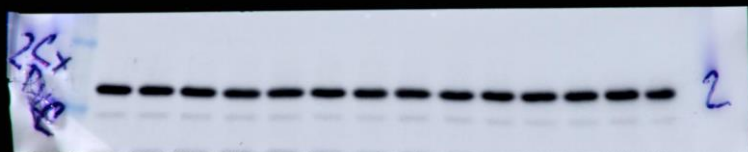

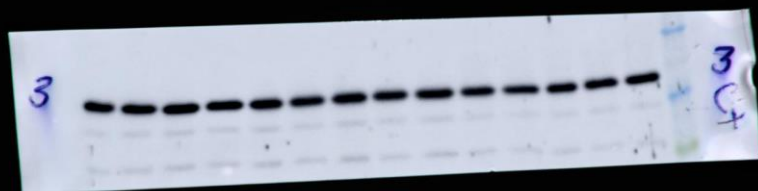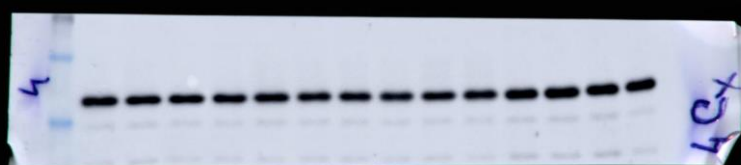



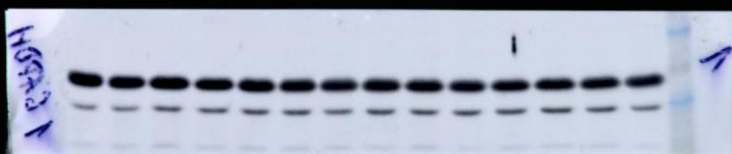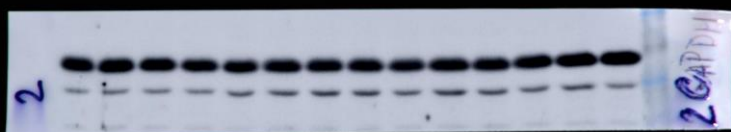

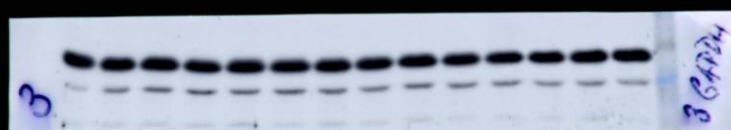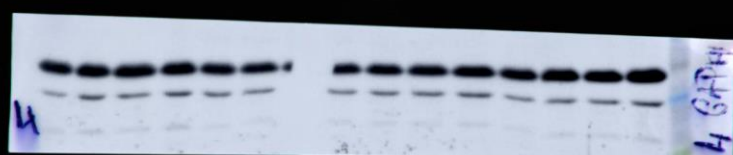

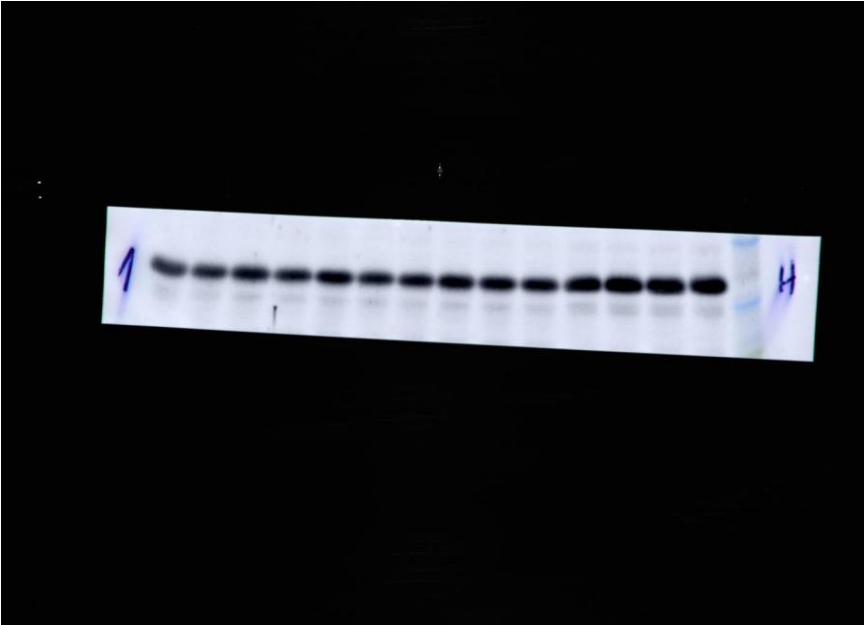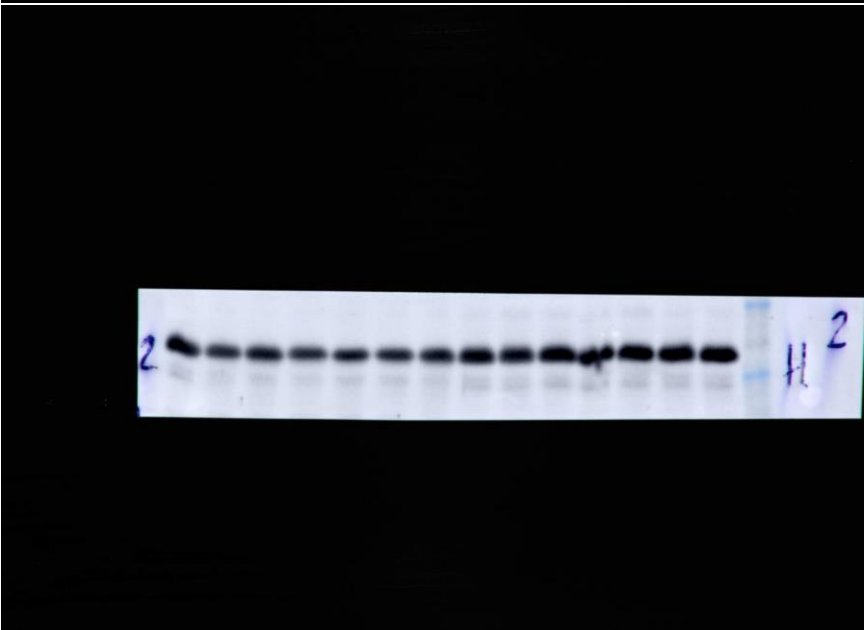

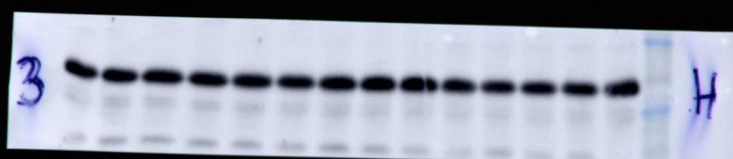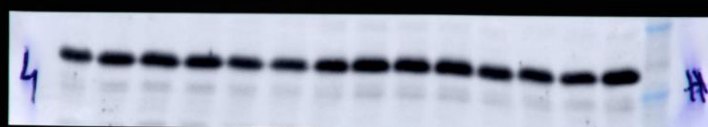

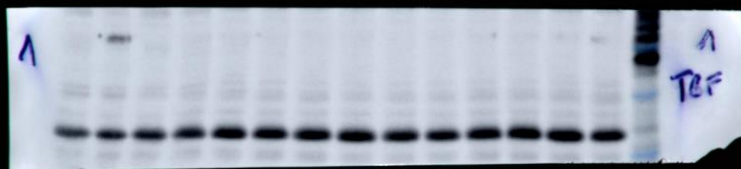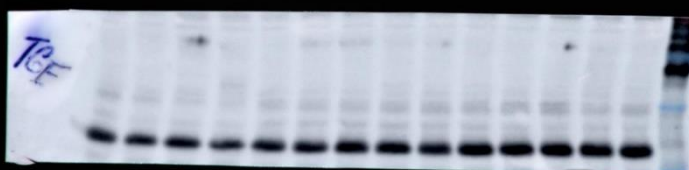

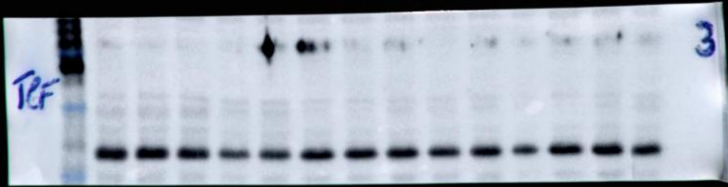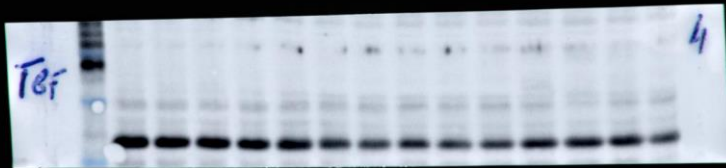

Supplement: s1 [file s1]
